# Supplementary material
Source: MDPI journal article supplement (https://www.mdpi.com/2813-0391/1/1/13)
Supplement: s1 [file s1]

# An Experimentally Validated Selection Protocol for Biochar as a Sustainable Component in Green Roofs

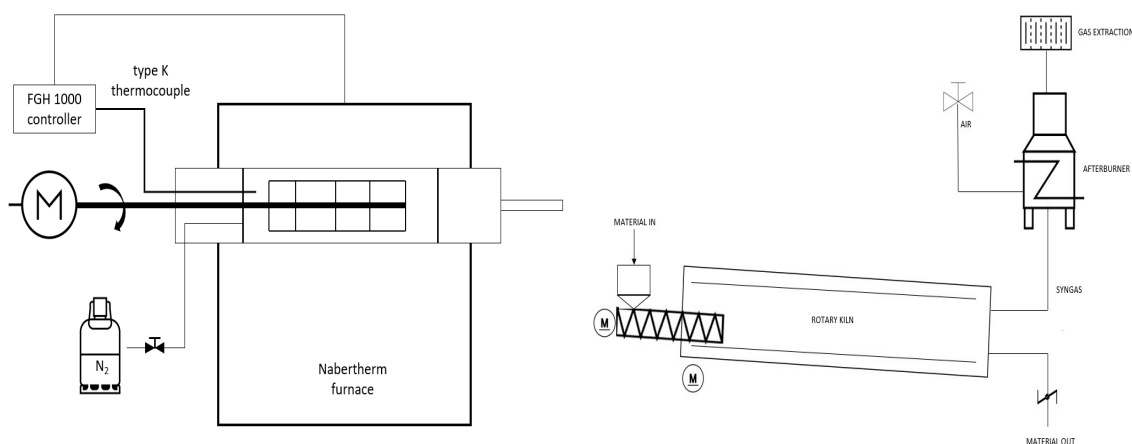

**Figure S1.** Schematic representation of the lab-scale batch reactor (left) and the pilot scale reactor (right) [1].

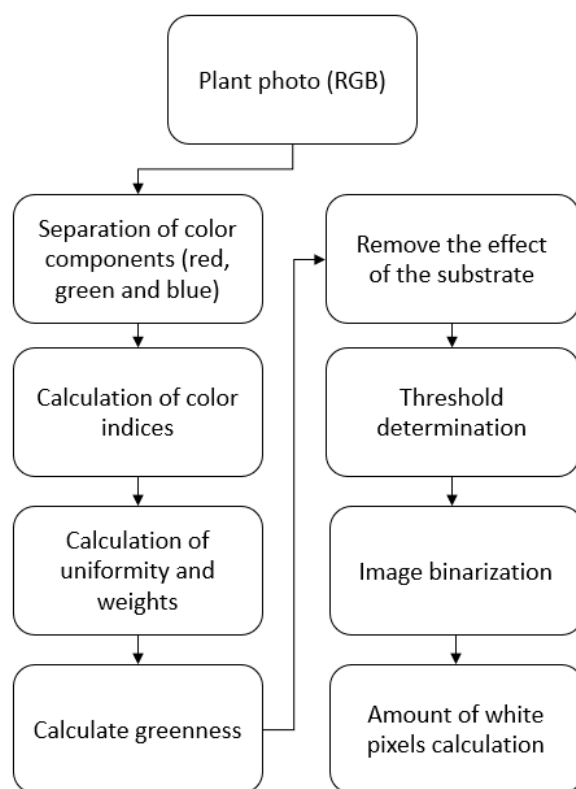

**Figure S2.** Flow diagram for green segmentation strategy.

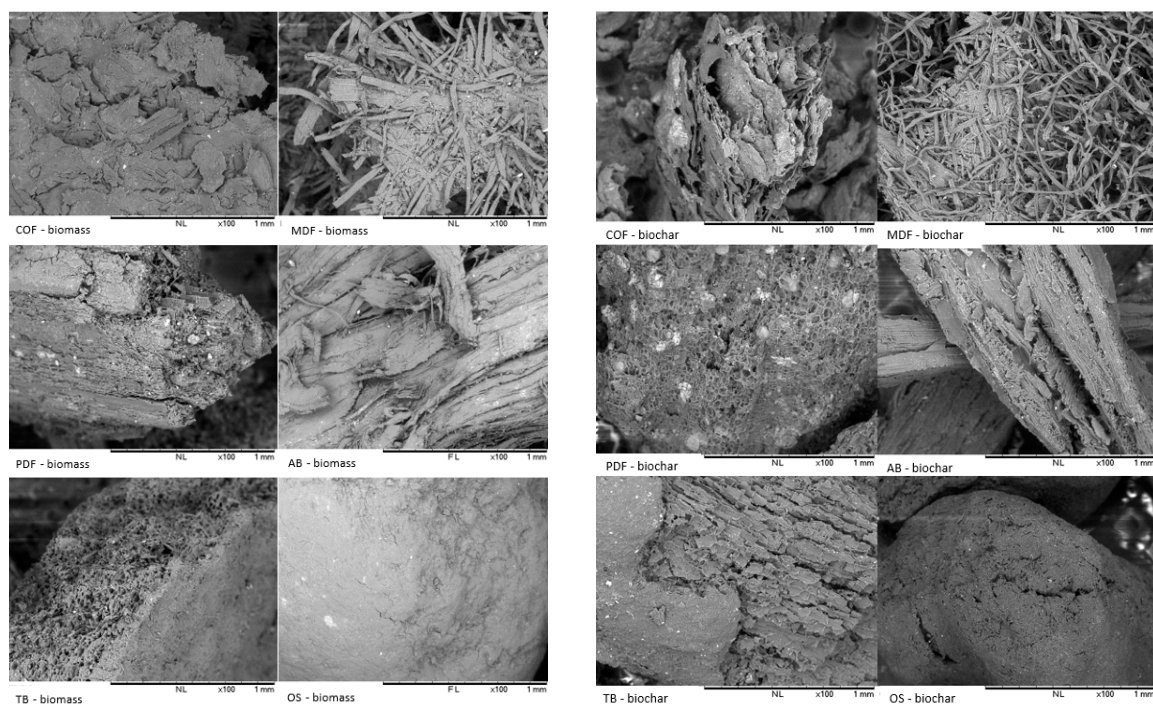

**Figure S3.** SEM images of biomasses and biochars produced in the pilot scale reactor (T = 450 °C).

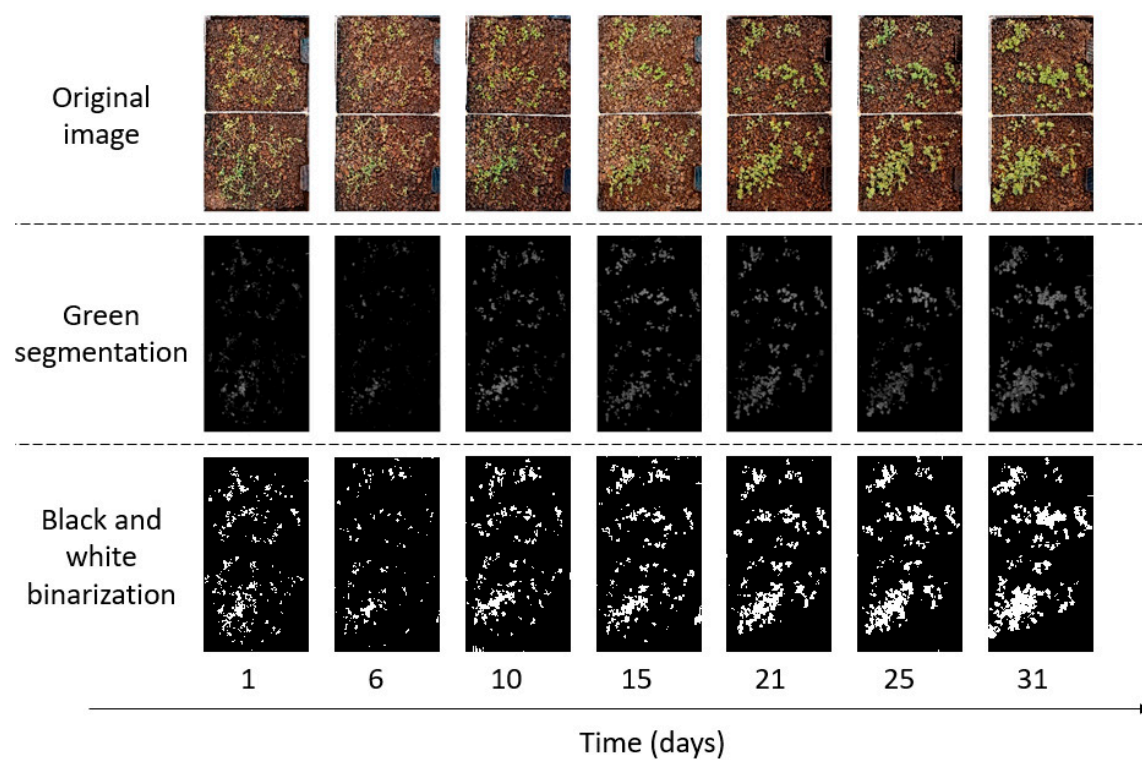

**Figure S4.** Growth process of *Sedum Hispanicum* approached as surface green coverage on substrate with 5 wt. % of biochar during 31 days. Top: original image, middle: image after green segmentation and bottom: image after black and white binarization.

**Table S1.** Band assignments of FT-IR spectra of the different biomass samples. Results of FT-IR for MDF were previously published [2].

| Wavenumber<br>(cm <sup>-1</sup> ) | COF | MDF | PDF | AB | TB | OS | Peak shape                   | Band assignment                                                                                                                                                                                                    | Source |
|-----------------------------------|-----|-----|-----|----|----|----|------------------------------|--------------------------------------------------------------------------------------------------------------------------------------------------------------------------------------------------------------------|--------|
| 3600-3100                         | x   | x   | x   | x  | x  | x  | Very broad                   | Multitude of OH stretching in the phenolic and aliphatic structures of cellulose, hemicellulose and lignin. When N is present in higher concentrations (COF, MDF and AB), NH stretching vibrations are also found. | [3]    |
| 2950,2925 and 2850                | x   | x   | x   | x  | x  | x  | Shoulder + sharp double peak | Symmetric and asymmetric C-H stretching vibrations                                                                                                                                                                 | [3, 4] |
| 1736                              | x   | x   | x   | x  | x  | x  | Broad                        | C=O stretch hemicellulose                                                                                                                                                                                          | [4]    |
| 1643                              | x   | x   | x   | x  | x  | x  | Broad                        | OH-bending of absorbed water                                                                                                                                                                                       | [5]    |
| 1608                              | x   | x   | x   | x  | x  | x  | Broad                        | C=C symmetric stretching of aromatic ring systems                                                                                                                                                                  |        |
| 1539                              | x   | x   |     | x  |    | x  | Weak                         | C=C stretch in a nitrogen based ring                                                                                                                                                                               | [6]    |
| 1513                              | x   | x   | x   | x  | x  | x  | Weak                         | Aromatic ring vibration in lignin                                                                                                                                                                                  | [5]    |
| 1455                              | x   | x   | x   | x  | x  | x  | Weak                         | CH <sub>3</sub> and CH <sub>2</sub> deformation                                                                                                                                                                    | [3, 5] |
| 1425                              | x   | x   | x   | x  | x  | x  | Weak                         | HCH and OCH in plane bending vibration of cellulose                                                                                                                                                                | [3]    |
| 1371                              | x   | x   | x   | x  | x  | x  | Weak                         | CH and OH bending                                                                                                                                                                                                  | [3]    |
| 1321                              | x   | x   | x   | x  | x  | x  | Weak                         | CH <sub>2</sub> wagging in cellulose and hemicellulose or OH bending                                                                                                                                               | [3]    |
| 1262                              | x   | x   |     | x  | x  |    | Sharp                        | aromatic ring vibration of guaiacyl lignin                                                                                                                                                                         | [3]    |
| 1240                              | x   | x   | x   | x  | x  | x  | Broad                        | C-O stretch and O-H in plane bending in polysaccharides and syringyl lignin                                                                                                                                        | [4]    |
| 1155                              | x   | x   | x   | x  | x  | x  | Shoulder                     | C-O-C band vibration in cellulose and hemicellulose                                                                                                                                                                | [3, 5] |
| 1106                              | x   | x   | x   | x  | x  | x  | shoulder                     | O-H band vibration in cellulose and hemicellulose                                                                                                                                                                  | [3, 5] |
| 1050                              | x   | x   | x   | x  | x  |    | Shoulder                     | C-O stretching in holocellulose                                                                                                                                                                                    | [7]    |
| 1033                              | x   | x   | x   | x  | x  | x  | Very sharp                   | aromatic C-H in plane deformation of guaiacyl lignin and C-O deformation                                                                                                                                           | [3–5]  |
| 893                               | x   | x   | x   | x  | x  | x  | Weak                         | COC, CCO and CH deformation in cellulose and hemicellulose                                                                                                                                                         | [5]    |
| 808                               | x   | x   | x   | x  | x  | x  | Weak                         | C-H bending                                                                                                                                                                                                        |        |
| 772                               | x   | x   | x   | x  | x  | x  | Weak                         | C-H bending                                                                                                                                                                                                        |        |
| 718                               | x   | x   | x   | x  |    |    | Weak                         | Ca-O bonds                                                                                                                                                                                                         | [8]    |

**Table S2.** Band assignments of FT-IR spectra of the different biochar samples, adapted from [2, 9–12]. Results of FT-IR for MDF were previously published [2].

| Wavenumber (cm <sup>-1</sup> ) | COF | MDF | PDF | AB | TB | OS | Trend with increasing temperature | Band assignment                                                                                                                                                                                   |
|--------------------------------|-----|-----|-----|----|----|----|-----------------------------------|---------------------------------------------------------------------------------------------------------------------------------------------------------------------------------------------------|
| 3600-3100                      | x   | X   | x   | x  | x  |    | --                                | Multitude of OH-stretching frequencies in phenolic and aliphatic structures of degradation products of cellulose, hemicellulose and lignin or N-H stretching in biomasses with enhanced N content |
| 3025                           |     | X   | x   |    |    |    | ++                                | C <sub>sp2</sub> -H stretching vibration of aromatic structures                                                                                                                                   |
| 2950,2925 and 2850             | x   | X   | x   | x  |    | x  | --                                | C-H symmetric and asymmetric bond stretching in aliphatic and alicyclic components                                                                                                                |
| 2175                           | x   |     |     |    |    |    | ++                                | Nitrile groups                                                                                                                                                                                    |
| 1700-1600                      | x   | x   | x   | x  |    | x  | --                                | C=O stretching vibrations as found in degradation products of hemicellulose                                                                                                                       |
| 1580                           |     | x   | x   | x  | x  | x  | Normalized                        | C=O stretching of aromatic moieties                                                                                                                                                               |
| 1435                           |     | x   |     |    |    |    | ++                                | C=C stretching of aromatic moieties                                                                                                                                                               |
| 1420                           | x   |     | x   |    | x  |    | ++                                | CaCO <sub>3</sub> and other carbonates like K <sub>2</sub> CO <sub>3</sub>                                                                                                                        |
| 1375                           |     | x   |     | x  |    |    | --                                | C-H deformation                                                                                                                                                                                   |
| 1300-1100                      | x   |     |     |    |    | x  | --                                | C-N and C-O functionalities                                                                                                                                                                       |
| 1160                           |     |     | x   |    | x  | x  | --                                | C-O stretching                                                                                                                                                                                    |
| 1107                           |     |     | x   |    |    |    | ++                                | Si-O bonds*                                                                                                                                                                                       |
| 1020                           |     | x   |     | x  |    | x  | ++                                | Aromatic ethers                                                                                                                                                                                   |
| 875 (High ash biomass)         | x   |     | x   |    | x  |    | ++                                | CaCO <sub>3</sub> and other carbonates like K <sub>2</sub> CO <sub>3</sub>                                                                                                                        |
| 875 (Low ash biomass)          |     | x   |     | x  |    | x  | ++                                | Aromatic C-H bending                                                                                                                                                                              |
| 810                            |     | x   |     | x  | x  | x  | ++                                | Aromatic C-H bending                                                                                                                                                                              |
| 755                            |     | x   | x   | x  | x  | x  | ++                                | Aromatic C-H bending                                                                                                                                                                              |
| 718                            | x   |     | x   |    | x  |    | ++                                | CaCO <sub>3</sub> and other carbonates like K <sub>2</sub> CO <sub>3</sub>                                                                                                                        |
| 675                            |     | x   | x   | x  | x  | x  | ++                                | Aromatic C-H out of plane bending                                                                                                                                                                 |
| 620                            | x   | x   | x   |    | x  |    | ++                                | Aromatic C-H out of plane bending                                                                                                                                                                 |

**Table S3.** Heavy metal concentrations in all biochars.

|         | As (mg/kg) | Cd (mg/kg) | Cr (mg/kg) | Cu (mg/kg) | Hg (mg/kg) | Ni (mg/kg) | Pb (mg/kg) | Zn (mg/kg) |
|---------|------------|------------|------------|------------|------------|------------|------------|------------|
| COF350  | <100       | <10        | <20        | 213 ± 12   | <100       | <20        | <100       | 108 ± 2    |
| COF450B | <100       | <10        | <20        | 235 ± 10   | <100       | <20        | <100       | 108 ± 5    |
| COF500  | <100       | <10        | <20        | 292 ± 3    | <100       | <20        | <100       | 122 ± 1    |
| COF550  | <100       | <10        | <20        | 248 ± 5    | <100       | <20        | <100       | 110 ± 1    |
| COF450C | <100       | <10        | <20        | 195 ± 2    | <100       | <20        | <100       | 91 ± 2     |
| MDF350  | <100       | <10        | <20        | 24 ± 1     | <100       | <20        | <100       | 28 ± 1     |
| MDF450B | <100       | <10        | <20        | 19 ± 1     | <100       | <20        | <100       | 27 ± 1     |
| MDF500  | <100       | <10        | 25 ± 2     | 32 ± 4     | <100       | <20        | <100       | 52 ± 4     |
| MDF550  | <100       | <10        | <20        | 50 ± 1     | <100       | <20        | <100       | 57 ± 4     |
| MDF450C | <100       | <10        | <20        | 21 ± 1     | <100       | <20        | <100       | <20        |
| PDF350  | <100       | <10        | 105 ± 1    | <20        | <100       | 121 ± 8    | <100       | <20        |
| PDF450B | <100       | <10        | 39 ± 6     | <20        | <100       | <20        | <100       | <20        |
| PDF500  | <100       | <10        | 30 ± 1     | <20        | <100       | <20        | <100       | <20        |
| PDF550  | <100       | <10        | 108 ± 5    | <20        | <100       | <20        | <100       | <20        |
| PDF450C | <100       | <10        | <20        | 28 ± 2     | <100       | <20        | <100       | 69 ± 1     |
| AB350   | <100       | <10        | 124 ± 4    | 87 ± 1     | <100       | 481 ± 11   | 488 ± 10   | 485 ± 49   |
| AB450B  | <100       | <10        | 135 ± 1    | 123 ± 7    | <100       | 524 ± 42   | 534 ± 40   | 572 ± 36   |
| AB500   | <100       | <10        | 135 ± 4    | 105 ± 1    | <100       | 589 ± 50   | 599 ± 60   | 553 ± 25   |
| AB550   | <100       | <10        | 155 ± 5    | 149 ± 11   | <100       | 1372 ± 20  | 1402 ± 26  | 976 ± 34   |
| AB450C  | <100       | <10        | 141 ± 2    | 161 ± 8    | <100       | <20        | 321 ± 27   | 315 ± 19   |
| TB350   | <100       | <10        | <20        | 31 ± 1     | <100       | <20        | <100       | 159 ± 7    |
| TB450B  | <100       | <10        | <20        | 27 ± 1     | <100       | <20        | <100       | 145 ± 4    |
| TB500   | <100       | <10        | 24 ± 2     | 33 ± 7     | <100       | <20        | <100       | 135 ± 8    |
| TB550   | <100       | <10        | 25 ± 3     | 42 ± 5     | <100       | <20        | <100       | 130 ± 2    |
| TB450C  | <100       | <10        | <20        | 29 ± 1     | <100       | <20        | <100       | 148 ± 3    |
| OS350   | <100       | <10        | <20        | 26 ± 1     | <100       | <20        | <100       | <20        |
| OS450B  | <100       | <10        | <20        | 25 ± 1     | <100       | <20        | <100       | <20        |
| OS500   | <100       | <10        | 67 ± 13    | 29 ± 2     | <100       | <20        | <100       | <20        |
| OS550   | <100       | <10        | 73 ± 14    | 50 ± 3     | <100       | 55 ± 1     | <100       | 21 ± 2     |
| OS450C  | <100       | <10        | <20        | 22 ± 1     | <100       | <20        | <100       | <20        |

## References

1. Haeldermans T., Lataf M.A., Vanroelen G., et al. Numerical prediction of the mean residence time of solid materials in a pilot-scale rotary kiln. *Powder Technol.* **2019**, 354, 392–401. <https://doi.org/10.1016/j.powtec.2019.06.008>
2. Haeldermans T., Claesen J., Maggen J., et al. Microwave assisted and conventional pyrolysis of MDF – Characterization of the produced biochars. *J. Anal. Appl. Pyrolysis* **2019**, 138, 218–230. <https://doi.org/10.1016/j.jaap.2018.12.027>
3. Xu F., Yu J., Tesso T., et al. Qualitative and quantitative analysis of lignocellulosic biomass using infrared techniques: A mini-review. *Appl. Energy* **2013**, 104, 801–809. <https://doi.org/10.1016/j.apenergy.2012.12.019>
4. Acquah G.E., Via B.K., Fasina O.O., Eckhardt L.G. Rapid Quantitative Analysis of Forest Biomass Using Fourier Transform Infrared Spectroscopy and Partial Least Squares Regression. *J. Anal. Methods Chem.* **2016**, 2016, 1–11. <https://doi.org/10.1155/2016/1839598>
5. Müller G., Bartholme M., Kharazipour A., Polle A. FTIR-ATR spectroscopic analysis of changes in fiber properties during insulating fiberboard manufacture of Beech Wood. *Wood Fiber Sci.* **2008**, 40, 532–543
6. Lyman D.J., Benck R., Dell S., et al. FTIR-ATR analysis of brewed coffee: Effect of roasting conditions. *J. Agric. Food Chem.* **2003**, 51, 3268–3272. <https://doi.org/10.1021/jf0209793>
7. Lao W., Li G., Zhou Q., Qin T. Quantitative analysis of biomass in three types of wood-plastic composites by FTIR spectroscopy. *BioResources* **2014**, 9, 6073–6086. <https://doi.org/10.15376/biores.9.4.6073-6086>
8. Galván-Ruiz M., Hernández J., Baños L., et al. Characterization of Calcium Carbonate, Calcium Oxide, and Calcium Hydroxide as Starting Point to the Improvement of Lime for Their Use in Construction. *J. Mater. Civ. Eng.* **2009**, 21, 694–698. [https://doi.org/10.1061/\(ASCE\)0899-1561\(2009\)21:11\(694\)](https://doi.org/10.1061/(ASCE)0899-1561(2009)21:11(694))
9. Liu Y., He Z., Uchimiya M. Comparison of Biochar Formation from Various Agricultural By-Products Using FTIR Spectroscopy. *Mod. Appl. Sci.* **2015**, 9, 246–253. <https://doi.org/10.5539/mas.v9n4p246>
10. Zhao L., Cao X., Mašek O., Zimmerman A. 2013 Heterogeneity of biochar properties as a function of feedstock sources and production temperatures. *J. Hazard. Mater.* **2013**, 256, 1–9. <https://doi.org/10.1016/j.jhazmat.2013.04.015>
11. Molenda J., Swat M., Osuch-Słomka E. Effect of Thermal Conditions of Pyrolysis Process on the Quality of Biochar Obtained from Vegetable Waste. *Eng. Prot. Environ.* **2018**, 21, 289–302. <https://doi.org/10.17512/ios.2018.3.7>
12. Dai L., Tan F., Li H., et al. Calcium-rich biochar from the pyrolysis of crab shell for phosphorus removal. *J. Environ. Manage.* **2017**, 198, 70–74. <https://doi.org/10.1016/j.jenvman.2017.04.057>
